# Supplementary material
Source: publisher site journal article supplement (http://static.cambridge.org/content/id/urn:cambridge.org:id:article:S1751731119002994/resource/name/S1751731119002994supp001.docx)
Supplement: Supplementary file 1 [file S1751731119002994supp001.docx]

***animal* journal**

**Denatonium as a bitter taste receptor agonist damages jejunal epithelial cells of yellow-feathered chickens via inducing apoptosis**

Jingle Jiang, Zengpeng Lv, Lina Qi, Hamdard Enayatullah, Quanwei Wei, Debing Yu, Fangxiong Shi

**Supplementary material**

**Supplementary Table S1. Composition and ingredients of the basic diets for yellow-feathered chickens in this study**

|  | 1 to 28 d | 28 to 56 d |
| --- | --- | --- |
| Ingredient (%) |  |  |
| Corn | 61.52 | 74.00 |
| Soybean meal | 29.00 | 12.00 |
| Soybean oil | 2.44 | 2.60 |
| Corn gluten meal | 2.00 | 7.32 |
| Dicalcium phosphate | 1.68 | 1.02 |
| Premix | 1.50 | 1.00 |
| Limestone | 1.15 | 1.05 |
| Lysine sulfate (65%) | 0.51 | 0.80 |
| DL-Methionine | 0.20 | 0.21 |
| Total | 100 | 100 |
| Calculation of nutrients |  |  |
| Metabolizable energy, MJ/kg | 11.92 | 12.13 |
| Crude protein, % | 21.00 | 19.00 |
| Lysine, % | 1.10 | 0.97 |
| Methionine, % | 0.46 | 0.40 |
| Methionine + Cystine, % | 0.80 | 0.72 |
| Calcium, % | 1.00 | 0.90 |
| Available phosphorus, % | 0.70 | 0.65 |

Provided the following % per kilogram in completed diet: vitamin A (all-trans retinol), 12500 IU; vitamin D3 (cholecalciferol), 2500 IU; vitamin E (dl-α-tocopheryl acetate), 30 IU; vitamin K3, 2.65 mg; vitamin B1, 2 mg; vitamin B2, 6 mg; nicotinic acid, 50 mg; pantothenic acid, 12 mg; vitamin B6, 4 mg; folic acid, 1.25 mg; vitamin B12, 0.025 mg; biotin, 0.25 mg; Fe, 50 mg; Zn, 75 mg; Mn, 100 mg; Cu, 8 mg; I, 0.35 mg; Co, 0.2 mg; and Se, 0.15 mg.
